# Supplementary material
Source: publisher figshare collection journal article supplement (https://acs.figshare.com/ndownloader/files/3853912)
Supplement: Supplementary file 1 [file 3853912]

Supporting Information for:

**Electron Energy Loss of Terrylene Deposited on Au(111):  
Vibrational and Electronic Spectroscopy**

*P. Navarro<sup>1</sup>, F.C. Bocquet<sup>2,3</sup>, I. Deperasińska<sup>4</sup>, G. Pirug<sup>2,3</sup>, F. S. Tautz<sup>2,3</sup>, M. Orrit<sup>1</sup>*

<sup>1</sup> *Huygens-Kamerlingh Onnes Laboratory, University of Leiden  
2300 RA Leiden (Netherlands)*

<sup>2</sup> *Peter Grünberg Institut (PGI-3), Forschungszentrum Jülich, 52425 Jülich (Germany)*

<sup>3</sup> *Jülich-Aachen Research Alliance (JARA), Fundamentals of Future Information Technology,  
52425, Jülich (Germany)*

<sup>4</sup> *Institute of Physics, Polish Academy of Sciences, 02-668, Warsaw (Poland)*

### S1. Deposition of Terrylene on Au(111) followed by XPS

Figure S1 shows the evolution of the XPS intensity signals after exposure of the Au(111) surface to terrylene. The spectra show the expected doublet peak for gold, which corresponds to the Au  $4f_{7/2}$  electrons with binding energy of 87.1 eV and the Au  $4f_{5/2}$  electrons with binding energy of 87.8 eV. The signal decreases as terrylene is deposited on the gold surface.

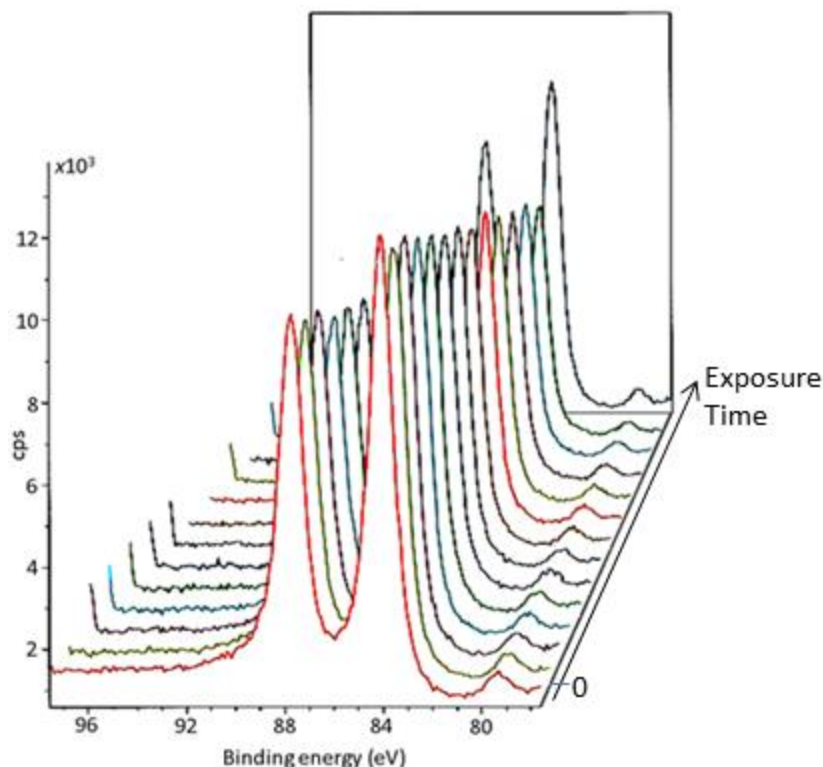

*Figure S1a* : The first XPS spectrum corresponds to the clean Au(111) surface before deposition of terrylene. The peak at 87.8 eV corresponds to the Au  $4f_{7/2}$  and the peak at 84.1 eV to the Au  $4f_{5/2}$ . The deposition times for each spectrum were 2, 4, 6, 8, 10, 12, 14, 16, 18, 20, 22, 27 and 42 min exposure. The last spectrum corresponds to clean surface again after sputtering. The temperature in the Knudsen cell was  $198 \pm 2^\circ\text{C}$ .

Figure S1b shows the increasing XPS signal of the C1s electrons with binding energy 284.2 eV as a function of increasing exposure of the gold surface to terrylene and show the complementary growth of the carbon signal.

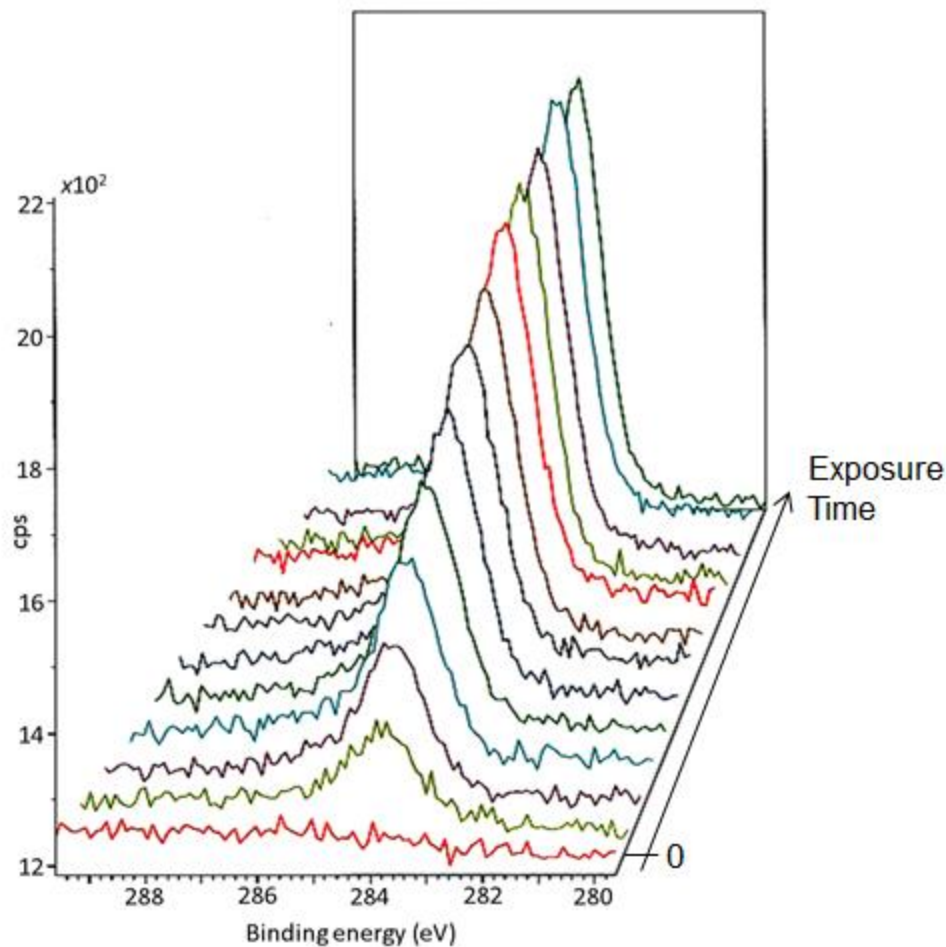

*Figure S1b: XPS spectra of Au(111) at various deposition stages of terrylene films in the carbon region, for the C1s signal. Same conditions as for Fig. S1a.*

Figure S1c shows the integrated intensity from the correspondent peaks in Figs. S1a and b, respectively. One can clearly observe the decrease of the *Au* signal correlated to the increase of *C* signal due to the deposition of terrylene in the surface. The HREEL spectra shown in Fig.3 (main text) and in Fig.S2, were taken exactly after recording these XPS spectra. In this way we followed the evolution of the HREEL spectra as a function of increasing terrylene deposition.

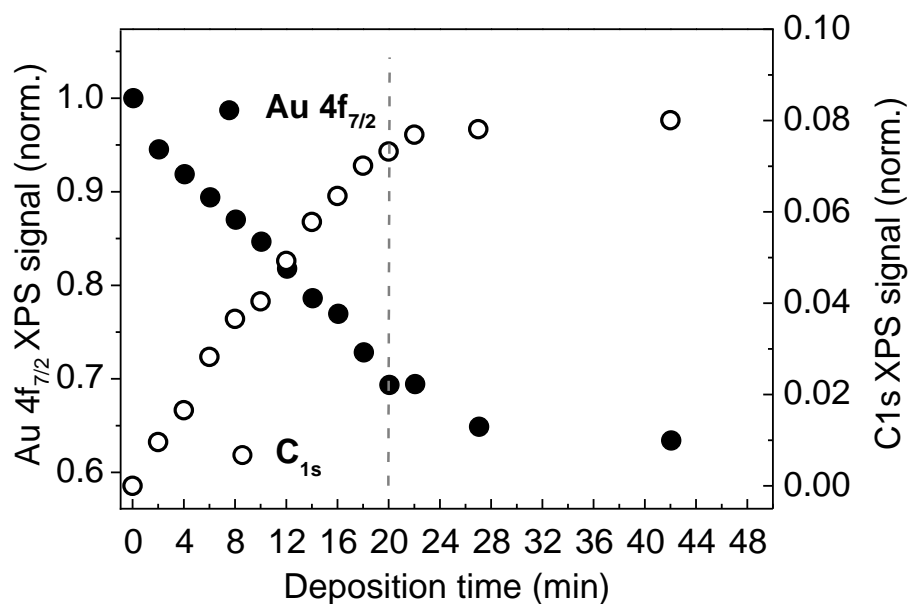

*Figure S1 c: Filled dots (●) show the integrated intensity of the Au 4f<sub>7/2</sub> electrons with binding energy 84.1 eV. Empty dots (○) show the C1s electrons with binding energy 284.2 eV. Both signals were normalized to the Au 4f<sub>7/2</sub> intensity obtained for the clean gold surface before and after the experiment. The dotted line indicates when the surface presumably becomes fully covered with terrylene. The gold signal decays to about 60% of the maximum, showing that terrylene is not deposited as a uniform film any more. This points to a Stranski-Krastanov growth mode.*

## S2. HREEL at increasing deposition times

The data shown in Fig.S2 correspond to the HREEL spectra for increasing deposition of terrylene. These were taken after each exposition shown in Fig S1. Figure 3 shows data for very high exposition times where clear changes on the HREELS can be observed. Therefore, the data in Fig.S2 complements data on Fig. 3 (main text). The main peak at  $802\text{ cm}^{-1}$  appears even after the shortest deposition time (2 min), where other features can barely be seen. The very weak intensity in the *in-plane* region  $1280$  and  $1495\text{ cm}^{-1}$  (insert zoom  $40\times$ ) can be due to the electrostatic image effect of the gold surface.

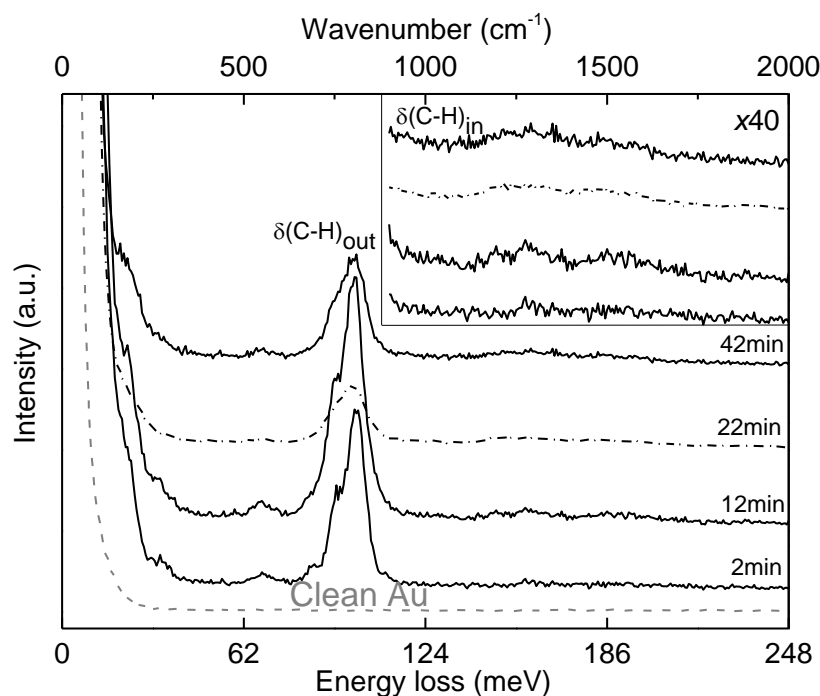

**Figure S2:** The specular HREELS spectra as a function of increasing deposition time of terrylene on a clean gold surface (dotted spectrum) up to 42 min. The beam energy used was  $E_0 = 5\text{ eV}$  and the integration time was 30 min. The insert shows the same energy interval from  $800 - 2000\text{ cm}^{-1}$ , magnified by a factor of 40.

### S3. Optical spectroscopy of terrylene in solution

This spectrum is useful to compare the electronic excitation of our terrylene films by electron impact in Fig.4 with the optical excitation of the HOMO  $\rightarrow$  LUMO transition of terrylene in solution. The maximum absorption peak appears at  $17\,699\text{ cm}^{-1}$  with a 0-1 vibronic component at  $19\,157\text{ cm}^{-1}$ .

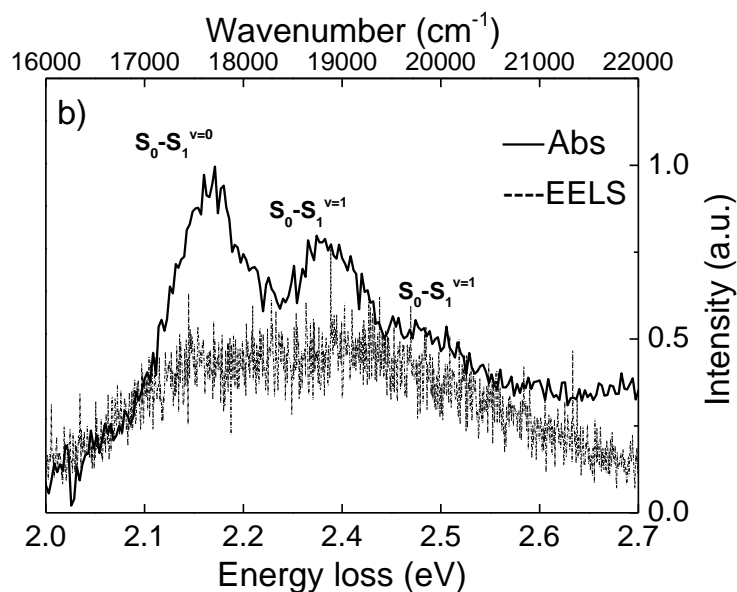

*Figure S3: Solid line: absorption spectrum of a terrylene solution in ortho-dichlorobenzene. The dashed line is the HREELS spectrum of Fig.4 reproduced for comparison (the upper axis shows the wavenumber of the optical spectrum, compared to the energy loss on the lower axis).*

**Table S1:** Symmetry, frequencies, IR activity, and reduced masses of the 132 ground-state vibrations of terrylene calculated with the DFT B3LYP/6-31 G(d,p) method. Below: visualization of normal modes (visualization with the use of Facio 16.2.1)

| no | sym | (cm <sup>-1</sup> ) | IR     | red.mass | in plane /<br>out<br>of plane | no  | sym | (cm <sup>-1</sup> ) | IR      | red.mass | in plane /<br>out<br>of plane |
|----|-----|---------------------|--------|----------|-------------------------------|-----|-----|---------------------|---------|----------|-------------------------------|
| 1  | AU  | 20.7                | 0.0    | 4.937    | out                           | 67  | B2G | 980.0               | 0.0     | 1.304    | out                           |
| 2  | B1G | 28.4                | 0.0    | 4.400    | out                           | 68  | B2U | 1044.5              | 2.7285  | 7.010    | in                            |
| 3  | B3U | 36.9                | 0.1459 | 5.706    | out                           | 69  | AG  | 1058.9              | 0.0     | 3.752    | in                            |
| 4  | B2G | 111.6               | 0.0    | 4.790    | out                           | 70  | B3G | 1081.0              | 0.0     | 3.950    | in                            |
| 5  | B3U | 112.3               | 0.1231 | 3.462    | out                           | 71  | B2U | 1093.2              | 2.6642  | 2.735    | in                            |
| 6  | B2U | 150.3               | 0.0906 | 5.705    | in                            | 72  | AG  | 1125.5              | 0.0     | 1.782    | in                            |
| 7  | B2G | 168.3               | 0.0    | 4.301    | out                           | 73  | B1U | 1126.3              | 3.0817  | 1.900    | in                            |
| 8  | B3U | 181.1               | 4.6656 | 4.251    | out                           | 74  | B3G | 1160.8              | 0.0     | 1.611    | in                            |
| 9  | AU  | 214.2               | 0.0    | 4.032    | out                           | 75  | B2U | 1173.1              | 2.5283  | 1.372    | in                            |
| 10 | B1G | 221.0               | 0.0    | 3.565    | out                           | 76  | B1U | 1186.0              | 0.0001  | 1.683    | in                            |
| 11 | AG  | 246.4               | 0.0    | 7.576    | in                            | 77  | AG  | 1186.0              | 0.0     | 1.294    | in                            |
| 12 | B3G | 276.9               | 0.0    | 5.695    | in                            | 78  | B3G | 1198.5              | 0.0     | 2.050    | in                            |
| 13 | B3U | 277.2               | 1.4772 | 5.750    | out                           | 79  | B3G | 1218.4              | 0.0     | 1.481    | in                            |
| 14 | AU  | 297.9               | 0.0    | 3.916    | out                           | 80  | B2U | 1222.8              | 0.0613  | 1.558    | in                            |
| 15 | B2G | 353.3               | 0.0    | 4.574    | out                           | 81  | B1U | 1232.4              | 7.6702  | 1.656    | in                            |
| 16 | B2U | 391.1               | 0.0120 | 7.027    | in                            | 82  | B2U | 1243.2              | 6.5670  | 1.748    | in                            |
| 17 | B3G | 396.9               | 0.0    | 6.431    | in                            | 83  | AG  | 1243.6              | 0.0     | 1.619    | in                            |
| 18 | B1U | 434.6               | 0.2223 | 4.860    | in                            | 84  | B3G | 1250.3              | 0.0     | 2.117    | in                            |
| 19 | B1G | 435.2               | 0.0    | 4.636    | out                           | 85  | B2U | 1256.9              | 3.9879  | 1.688    | in                            |
| 20 | AG  | 447.9               | 0.0    | 4.705    | in                            | 86  | AG  | 1307.9              | 0.0     | 2.804    | in                            |
| 21 | B2G | 468.4               | 0.0    | 3.662    | out                           | 87  | B2U | 1314.3              | 1.4489  | 5.351    | in                            |
| 22 | B3U | 471.4               | 0.0096 | 3.344    | out                           | 88  | B3G | 1330.9              | 0.0     | 2.622    | in                            |
| 23 | B1U | 478.7               | 4.0775 | 7.838    | in                            | 89  | B2U | 1334.3              | 6.7213  | 4.738    | in                            |
| 24 | B2G | 481.7               | 0.0    | 3.625    | out                           | 90  | B1U | 1341.6              | 0.0548  | 1.664    | in                            |
| 25 | AU  | 498.4               | 0.0    | 4.021    | out                           | 91  | AG  | 1343.7              | 0.0     | 2.616    | in                            |
| 26 | B1U | 528.0               | 7.8929 | 5.443    | in                            | 92  | B3G | 1380.5              | 0.0     | 3.956    | in                            |
| 27 | B2U | 538.8               | 1.0005 | 6.992    | in                            | 93  | B2U | 1385.5              | 1.7061  | 4.798    | in                            |
| 28 | AG  | 544.8               | 0.0    | 7.369    | in                            | 94  | AG  | 1391.1              | 0.0     | 5.888    | in                            |
| 29 | B3G | 554.1               | 0.0    | 6.283    | in                            | 95  | B1U | 1402.9              | 21.7449 | 4.820    | in                            |
| 30 | B3G | 570.5               | 0.0    | 7.373    | in                            | 96  | AG  | 1403.2              | 0.0     | 4.662    | in                            |
| 31 | B1G | 571.4               | 0.0    | 3.697    | out                           | 97  | B1U | 1414.4              | 70.6773 | 3.040    | in                            |
| 32 | B3U | 579.7               | 4.0859 | 4.862    | out                           | 98  | B1U | 1432.5              | 3.5711  | 2.975    | in                            |
| 33 | AG  | 590.1               | 0.0    | 6.498    | in                            | 99  | AG  | 1454.3              | 0.0     | 4.361    | in                            |
| 34 | B2G | 628.2               | 0.0    | 4.653    | out                           | 100 | AG  | 1480.8              | 0.0     | 2.185    | in                            |
| 35 | B2U | 637.1               | 0.4376 | 8.257    | in                            | 101 | B1U | 1491.1              | 9.3743  | 2.874    | in                            |
| 36 | AU  | 637.5               | 0.0    | 4.044    | out                           | 102 | B3G | 1494.1              | 0.0     | 2.564    | in                            |
| 37 | B1G | 643.8               | 0.0    | 2.397    | out                           | 103 | B3G | 1507.6              | 0.0     | 3.579    | in                            |

|    |     |       |          |       |     |     |     |        |          |       |    |
|----|-----|-------|----------|-------|-----|-----|-----|--------|----------|-------|----|
| 38 | AU  | 680.8 | 0.0      | 2.569 | out | 104 | B2U | 1508.9 | 0.9185   | 2.549 | in |
| 39 | B1U | 684.0 | 0.1339   | 6.041 | in  | 105 | B2U | 1551.2 | 13.6049  | 4.224 | in |
| 40 | B3U | 703.8 | 3.1865   | 4.240 | out | 106 | B3G | 1556.0 | 0.0      | 3.646 | in |
| 41 | B3G | 738.3 | 0.0      | 6.509 | in  | 107 | B2U | 1581.2 | 0.1469   | 4.748 | in |
| 42 | B3U | 765.7 | 35.1498  | 1.840 | out | 108 | AG  | 1605.2 | 0.0      | 5.205 | in |
| 43 | B2G | 772.2 | 0.0      | 1.825 | out | 109 | B1U | 1622.1 | 5.2468   | 4.259 | in |
| 44 | B1G | 774.2 | 0.0      | 1.299 | out | 110 | B1U | 1631.4 | 35.5680  | 5.928 | in |
| 45 | AU  | 778.9 | 0.0      | 1.481 | out | 111 | B3G | 1637.7 | 0.0      | 5.036 | in |
| 46 | B2G | 780.1 | 0.0      | 6.528 | out | 112 | AG  | 1643.3 | 0.0      | 5.019 | in |
| 47 | B1U | 801.0 | 29.3050  | 5.549 | in  | 113 | B1U | 1643.5 | 23.7887  | 5.019 | in |
| 48 | AG  | 806.8 | 0.0      | 5.337 | in  | 114 | AG  | 1646.5 | 0.0      | 7.043 | in |
| 49 | B1U | 814.6 | 3.7775   | 5.626 | in  | 115 | B2U | 1665.2 | 10.3815  | 6.047 | in |
| 50 | B3U | 829.6 | 144.9097 | 1.461 | out | 116 | B3G | 1668.4 | 0.0      | 7.071 | in |
| 51 | B1G | 832.4 | 0.0      | 1.695 | out | 117 | B3G | 3180.1 | 0.0      | 1.086 | in |
| 52 | AG  | 838.7 | 0.0      | 7.249 | in  | 118 | B2U | 3180.2 | 6.8479   | 1.086 | in |
| 53 | B2G | 843.8 | 0.0      | 3.257 | out | 119 | B1U | 3182.3 | 2.8223   | 1.086 | in |
| 54 | B3U | 844.2 | 1.3945   | 3.252 | out | 120 | AG  | 3182.4 | 0.0      | 1.086 | in |
| 55 | B2U | 844.3 | 2.2445   | 6.140 | in  | 121 | B3G | 3196.9 | 0.0      | 1.093 | in |
| 56 | AU  | 884.4 | 0.0      | 1.490 | out | 122 | B2U | 3197.4 | 25.2615  | 1.094 | in |
| 57 | B1G | 889.1 | 0.0      | 1.379 | out | 123 | B1U | 3198.4 | 176.8030 | 1.093 | in |
| 58 | B2G | 904.2 | 0.0      | 1.546 | out | 124 | AG  | 3199.2 | 0.0      | 1.094 | in |
| 59 | B3U | 909.3 | 0.4681   | 1.467 | out | 125 | B3G | 3206.6 | 0.0      | 1.090 | in |
| 60 | AU  | 933.5 | 0.0      | 1.335 | out | 126 | B1U | 3206.8 | 0.0847   | 1.090 | in |
| 61 | B2G | 941.9 | 0.0      | 1.374 | out | 127 | B2U | 3216.3 | 10.1628  | 1.094 | in |
| 62 | B1U | 942.4 | 17.8005  | 4.901 | in  | 128 | AG  | 3216.5 | 0.0      | 1.094 | in |
| 63 | B3G | 965.8 | 0.0      | 6.425 | in  | 129 | B3G | 3225.4 | 0.0      | 1.089 | in |
| 64 | B1G | 970.0 | 0.0      | 1.281 | out | 130 | B1U | 3225.4 | 10.5054  | 1.089 | in |
| 65 | AU  | 971.0 | 0.0      | 1.279 | out | 131 | B2U | 3232.1 | 69.7886  | 1.090 | in |
| 66 | B3U | 979.0 | 1.5802   | 1.307 | out | 132 | AG  | 3232.4 | 0.0      | 1.090 | in |



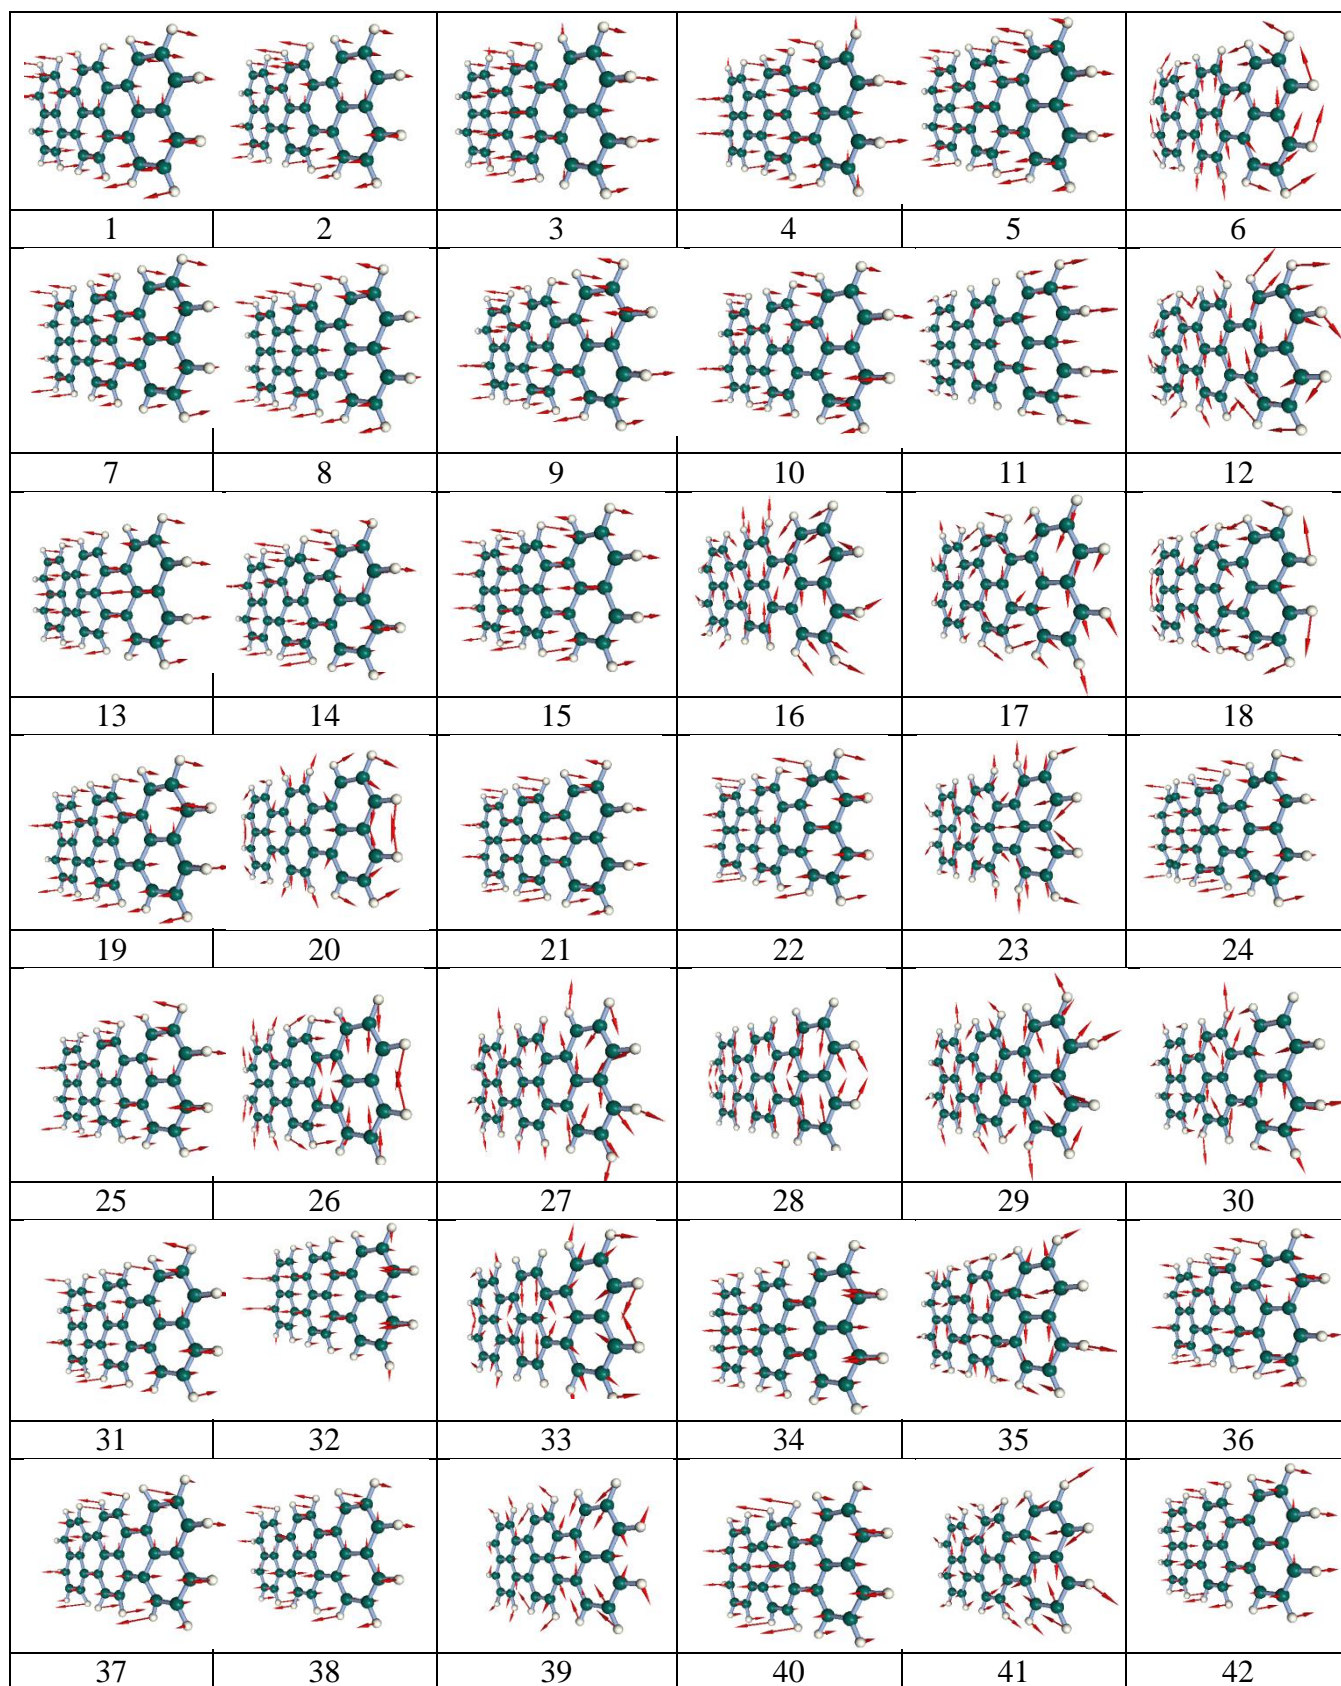

|                                                                                     |                                                                                     |                                                                                     |                                                                                      |                                                                                       |                                                                                       |
|-------------------------------------------------------------------------------------|-------------------------------------------------------------------------------------|-------------------------------------------------------------------------------------|--------------------------------------------------------------------------------------|---------------------------------------------------------------------------------------|---------------------------------------------------------------------------------------|
| 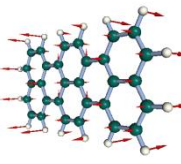   |    |    |    |    |    |
| 43                                                                                  | 44                                                                                  | 45                                                                                  | 46                                                                                   | 47                                                                                    | 48                                                                                    |
|    |    |    |    |    |    |
| 49                                                                                  | 50                                                                                  | 51                                                                                  | 52                                                                                   | 53                                                                                    | 54                                                                                    |
|    |    |    |    |    |    |
| 55                                                                                  | 56                                                                                  | 57                                                                                  | 58                                                                                   | 59                                                                                    | 60                                                                                    |
|   |   |   |   |   |   |
| 61                                                                                  | 62                                                                                  | 63                                                                                  | 64                                                                                   | 65                                                                                    | 66                                                                                    |
|  |  |  |  |  |  |
| 67                                                                                  | 68                                                                                  | 69                                                                                  | 70                                                                                   | 71                                                                                    | 72                                                                                    |
|  |  |  |  |  |  |
| 73                                                                                  | 74                                                                                  | 75                                                                                  | 76                                                                                   | 77                                                                                    | 78                                                                                    |



|                                                                                     |                                                                                     |                                                                                     |                                                                                     |                                                                                      |                                                                                       |
|-------------------------------------------------------------------------------------|-------------------------------------------------------------------------------------|-------------------------------------------------------------------------------------|-------------------------------------------------------------------------------------|--------------------------------------------------------------------------------------|---------------------------------------------------------------------------------------|
| 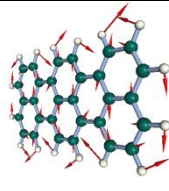   |    |    |    |    |    |
| 79                                                                                  | 80                                                                                  | 81                                                                                  | 82                                                                                  | 83                                                                                   | 84                                                                                    |
|    |    |    |    |    |    |
| 85                                                                                  | 86                                                                                  | 87                                                                                  | 88                                                                                  | 89                                                                                   | 90                                                                                    |
|    |    |    |    |    |    |
| 91                                                                                  | 92                                                                                  | 93                                                                                  | 94                                                                                  | 95                                                                                   | 96                                                                                    |
|   |   |   |   |   |   |
| 97                                                                                  | 98                                                                                  | 99                                                                                  | 100                                                                                 | 101                                                                                  | 102                                                                                   |
|  |  |  |  |  |  |
| 103                                                                                 | 104                                                                                 | 105                                                                                 | 106                                                                                 | 107                                                                                  | 108                                                                                   |
|  |  |  |  |  |  |
| 109                                                                                 | 110                                                                                 | 111                                                                                 | 112                                                                                 | 113                                                                                  | 114                                                                                   |

|                                                                                   |                                                                                   |                                                                                   |                                                                                    |                                                                                     |                                                                                     |
|-----------------------------------------------------------------------------------|-----------------------------------------------------------------------------------|-----------------------------------------------------------------------------------|------------------------------------------------------------------------------------|-------------------------------------------------------------------------------------|-------------------------------------------------------------------------------------|
| 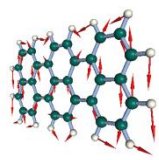 |  |  |  |  |  |
| 115                                                                               | 116                                                                               | 117                                                                               | 118                                                                                | 119                                                                                 | 120                                                                                 |
|  |  |  |  |  |  |
| 121                                                                               | 122                                                                               | 123                                                                               | 124                                                                                | 125                                                                                 | 126                                                                                 |
|  |  |  |  |  |  |
| 127                                                                               | 128                                                                               | 129                                                                               | 130                                                                                | 131                                                                                 | 132                                                                                 |
